# Supplementary material
Source: Springer Nature journal article supplement (https://www.springermedizin.de/resource/supplementary/13012_2011_511_MOESM6_ESM.pdf/9630092)

CONTEXT EVALUATION: Project's Needs Analysis Based Upon Sponsoring Program's Situational Analysis /Priorities

SHORT-TERM OUTCOMES

MID-TERM OUTCOMES

OUTPUTS

R

D

P

KU Groups Aware of Discovery

KU Groups Apply Discovery via Development Method

KU Groups Aware of Invention

KU Groups Apply Invention via Production Method

KU Groups Aware of Innovation

Innovation Launched

KU Interest and Use

KU Interest and Use

KU Interest and Use

KU Satisfaction and Market Success Tracked

Discovery Influences Practice and Policy

Invention Influences Practice and Policy

Innovation Influences Practice and Policy

Sustained Use Changes Practice, Policy and System

LONG-TERM Impact: Program Long-Range Goal Achieved

OUTCOMES AND IMPACT EVALUATION: Assesses and Documents Outcomes, Benefits and Risks

Sponsor Program Data Base

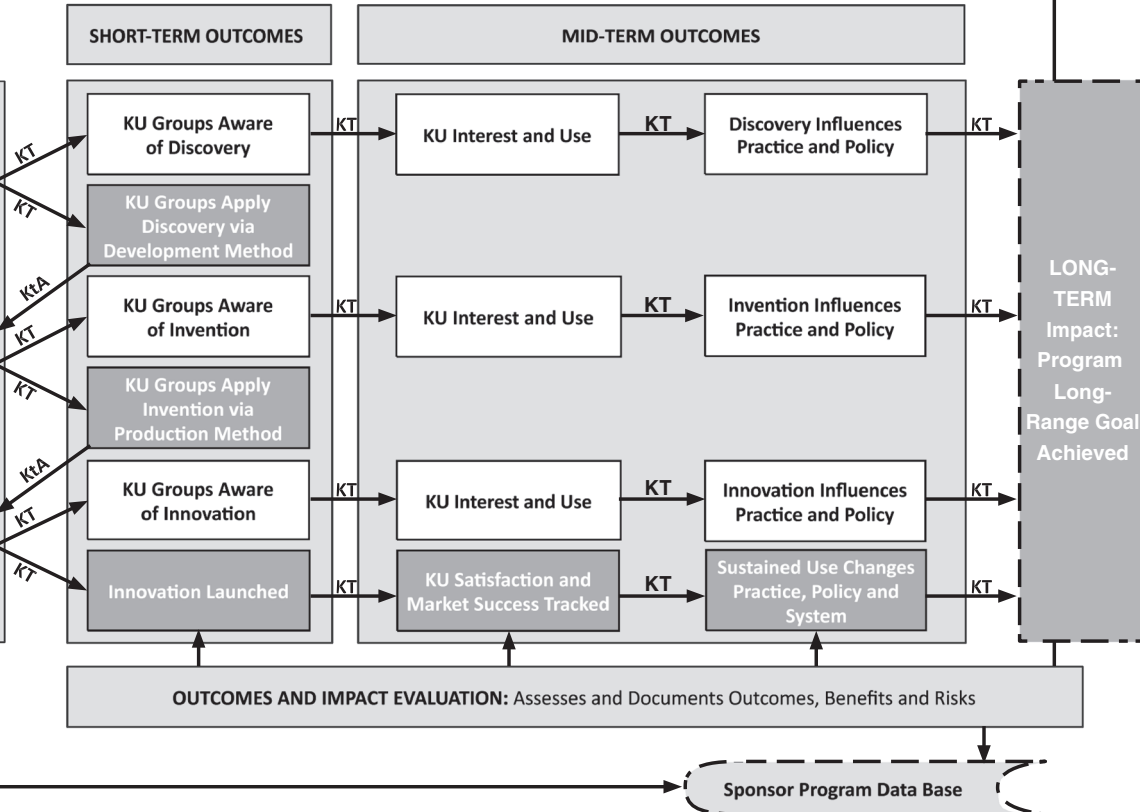

Supplement: MOESM6 [file 9630092]
